# Supplementary material
Source: PubMed Central journal article supplement (PMC4142681)
Supplement: NIHMS612449-supplement-2.pdf [file NIHMS612449-supplement-2.pdf]

## Supporting Information

for *Macromol. Biosci.*, DOI: 10.1002/mabi.201200384

### **An anti-angiogenic reverse thermal gel as a drug delivery system for age-related wet macular degeneration**

Daewon Park, Veeral Shah, Britta M. Rauck, Thomas R. Friberg, Yadong Wang\*

---

Dr. D. Park  
Department of Bioengineering, University of Colorado Denver Anschutz Medical Campus  
Aurora, CO 80045, USA

Dr. V. Shah, Dr. T.R. Friberg  
Department of Ophthalmology, University of Pittsburgh School of Medicine  
Pittsburgh, PA 15219, USA

B.M. Rauck, Prof. Y. Wang  
Department of Bioengineering, Chemical Engineering, Surgery and the McGowan Institute  
for Regenerative Medicine, University of Pittsburgh  
Pittsburgh, PA 15219, USA  
E-mail: yaw20@pitt.edu

---

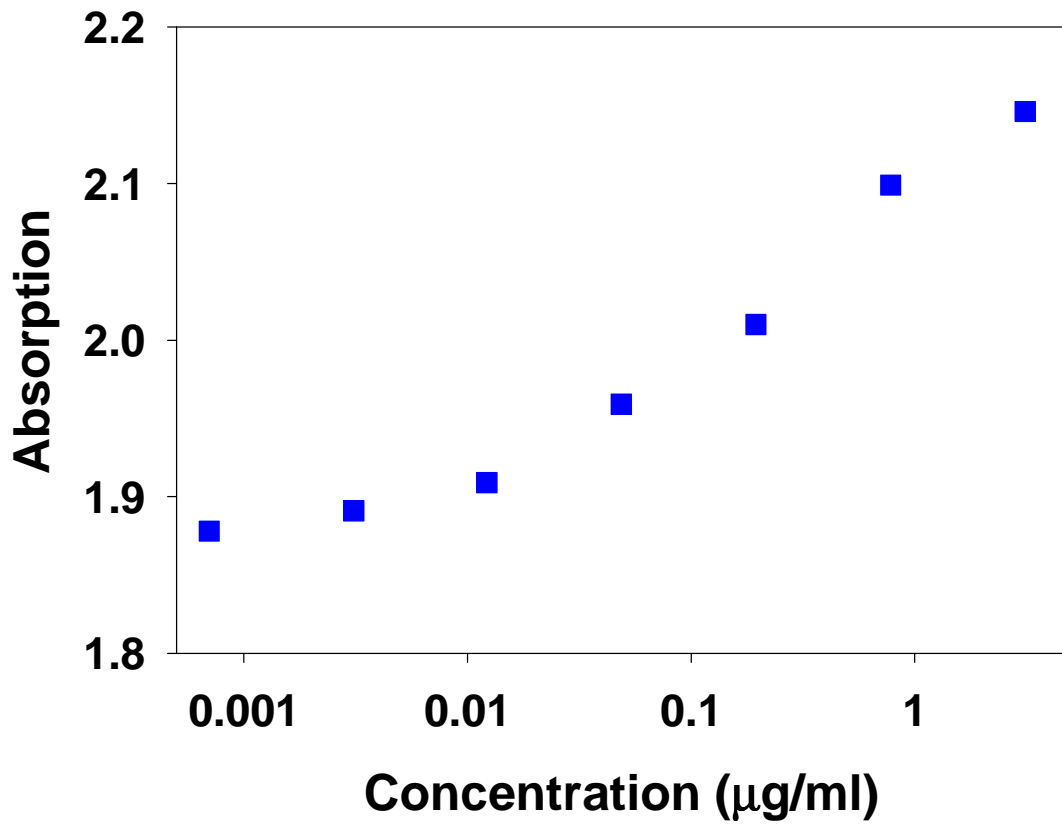

Figure S1. The bevacizumab standard curve, concentration vs absorption, measured between 0.2 ng/ml - 3.125 µg/ml. For the calculation, the linear region between 12.2 ng/ml - 3.125 µg/ml was used.

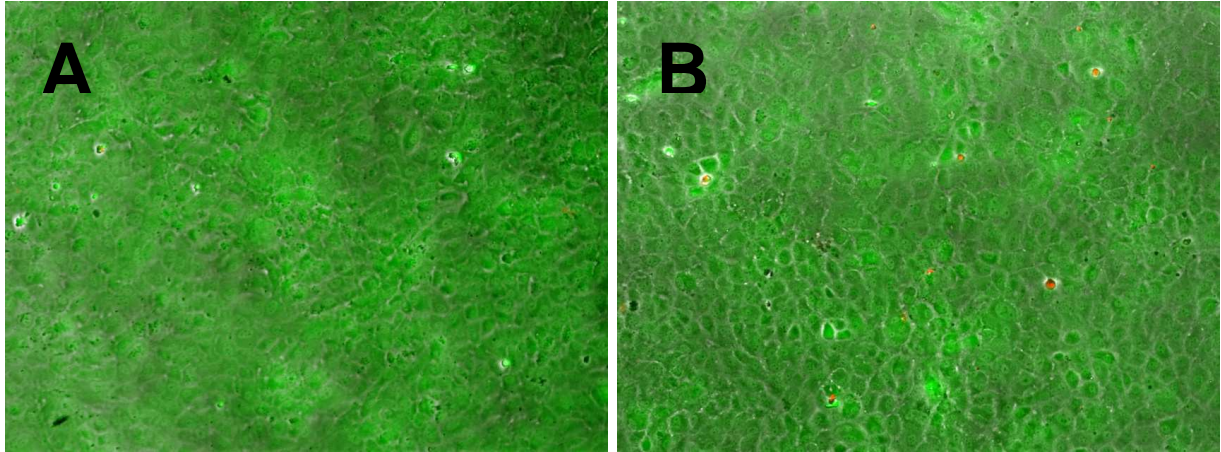

Figure S2. *In vitro* cytotoxicity studied using primary bovine corneal endothelium cells. Phase images (100 $\times$ ) of Calcein AM-treated cells cultured in (A) control TCPS and (B) ESHU conditions. No differences were observed between control and ESHU-exposed cells.
